# Supplementary material for: Computational insights into CH3MX (M = Cu, Ag and Au; X = H, F, Cl, Br and I)
Source: Royal Society of Chemistry journal article supplement (doi:10.1039/c6ra18033g), 2016-01-01
Supplement: c6ra18033g1.pdf [file c6ra18033g1.pdf]

## Electronic Supplementary Material

### Computational insights into CH<sub>3</sub>MX (M = Cu, Ag and Au; X = H, F, Cl, Br and I)

Zhengguo Huang\*   Yuan Yuan   Le Sun   Xiaohong Wang   Yuying Li

Tianjin Key Laboratory of Structure and Performance for Functional Molecules; Key Laboratory of Inorganic-Organic Hybrid Functional Materials Chemistry  
(Tianjin Normal University), Ministry of Education; College of Chemistry, Tianjin Normal University, Tianjin 300387, People's Republic of China

Table S1. The selected frequencies of the CH<sub>3</sub>X (X = H and halogens) and CH<sub>3</sub>M (M = coinage metals) calculated at the B3LYP level of theory <sup>a</sup>.

|                                | CH <sub>4</sub> | CH <sub>3</sub> F | CH <sub>3</sub> Cl | CH <sub>3</sub> Br | CH <sub>3</sub> I | CH <sub>3</sub> Cu | CH <sub>3</sub> Ag | CH <sub>3</sub> Au |
|--------------------------------|-----------------|-------------------|--------------------|--------------------|-------------------|--------------------|--------------------|--------------------|
| CH <sub>3</sub> , deform       | 1338.7 (12)     | 1481.3 (1)        | 1375.8 (12)        | 1324.5 (20)        | 1273.5 (28)       | 1132.4 (39)        | 1103.7 (62)        | 1201.6 (50)        |
| CH <sub>2</sub> , sys stretch  | 3033.0 (0)      | 3032.5 (33)       | 3072.8 (23)        | 3082.2 (16)        | 3087.1 (11)       | 3031.8 (21)        | 3055.5 (22)        | 3048.6 (11)        |
| CH <sub>2</sub> , asys stretch | 3135.0 (22)     | 3111.9 (28)       | 3167.3 (4)         | 3185.6 (1)         | 3195.0 (0)        | 3124.2 (5)         | 3156.2 (3)         | 3150.2 (1)         |
| $\nu$ (C-Au)                   |                 |                   |                    |                    |                   | 544.6 (3)          | 453.8 (2)          | 540.0 (0)          |

<sup>a</sup> Frequencies are in cm<sup>-1</sup> and intensities (in parentheses) are in km·mol<sup>-1</sup>.

\* Corresponding author. E-mail address: hsxyhgzg@126.com
